# Supplementary material
Source: PubMed Central journal article supplement (PMC3459292)
Supplement: NIHMS396289-supplement-1.pdf [file NIHMS396289-supplement-1.pdf]

## SUPPLEMENTARY MATERIAL

### Common variation at 6q16 within *HACE1* and *LIN28B* influences susceptibility to neuroblastoma

Sharon J. Diskin<sup>1,2,3</sup>, Mario Capasso<sup>4,5</sup>, Robert W. Schnepf<sup>1,2</sup>, Kristina A. Cole<sup>1,2,3</sup>, Edward F. Attiyeh<sup>1,2,3</sup>, Cuiping Hou<sup>6</sup>, Maura Diamond<sup>1,2</sup>, Erica L. Carpenter<sup>1,2</sup>, Cynthia Winter<sup>1,2</sup>, Hanna Lee<sup>1,2</sup>, Jayanti Jagannathan<sup>1,2</sup>, Valeria Latorre<sup>7,8</sup>, Achille Iolascon<sup>4,5</sup>, Hakon Hakonarson<sup>6</sup>, Marcella Devoto<sup>7,9,10</sup>, John M. Maris<sup>1,2,3,11</sup>

<sup>1</sup>Division of Oncology, Children's Hospital of Philadelphia, Philadelphia, PA, USA

<sup>2</sup>Center for Childhood Cancer Research, Children's Hospital of Philadelphia, Philadelphia, PA, USA

<sup>3</sup>Department of Pediatrics, Perelman School of Medicine, University of Pennsylvania, Philadelphia, PA, USA

<sup>4</sup>Dipartimento di Biochimica e Biotecnologie Mediche, Università degli Studi di Napoli "Federico II", Naples; Italy

<sup>5</sup>Ceinge- Biotecnologie Avanzate, Naples; Italy

<sup>6</sup>The Center for Applied Genomics, Children's Hospital of Philadelphia, Philadelphia, PA, USA

<sup>7</sup>Division of Genetics, The Children's Hospital of Philadelphia, Philadelphia, PA, USA

<sup>8</sup>Department of Cell Biology, Università della Calabria, 87036 Rende, Italy

<sup>9</sup>University of Rome "La Sapienza", Department of Molecular Medicine, Rome, Italy

<sup>10</sup>Department of Biostatistics and Epidemiology, Perelman School of Medicine, University of Pennsylvania, Philadelphia, PA, USA

<sup>11</sup>Abramson Family Cancer Research Institute, Perelman School of Medicine at the University of Pennsylvania, Philadelphia, PA, USA

## Table of Contents

|                                                                                                                                            |           |
|--------------------------------------------------------------------------------------------------------------------------------------------|-----------|
| <b>I. SUPPLEMENTARY TABLES .....</b>                                                                                                       | <b>3</b>  |
| Supplementary Table 1. Neuroblastoma patient characteristics.....                                                                          | 3         |
| Supplementary Table 2. Association results at previously reported loci.....                                                                | 4         |
| Supplementary Table 3. Genotype counts and statistical significance for 6q16 SNPs.....                                                     | 5         |
| Supplementary Table 4. Association results for 6q16 SNPs with first 20 PCs as covariates.....                                              | 6         |
| Supplementary Table 5. Association results for 6q16 SNPs conditioned on rs4336470.....                                                     | 7         |
| Supplementary Table 6. Correlation of rs4336470 genotypes (CC, TC, TT) with clinical variables.....                                        | 8         |
| Supplementary Table 7. Correlation of rs17065417 genotypes (AA, AC, CC) with clinical variables.....                                       | 9         |
| Supplementary Table 8. Pairwise interaction between most significant SNPs at five loci (case/control).....                                 | 10        |
| Supplementary Table 9. Pairwise interaction between most significant SNPs at five loci (case-only).....                                    | 11        |
| Supplementary Table 10. Genotyped and imputed SNP associations at 6q16 ( $P < 1 \times 10^{-6}$ ).....                                     | 12        |
| <b>II. SUPPLEMENTARY FIGURES.....</b>                                                                                                      | <b>13</b> |
| Supplementary Figure 1. Manhattan plot of discovery results.....                                                                           | 13        |
| Supplementary Figure 2. MDS plot of HapMap3 populations and neuroblastoma cases of European Ancestry.....                                  | 14        |
| Supplementary Figure 3. Quantile-Quantile plot of the expected and observed P-values.....                                                  | 15        |
| Supplementary Figure 4. Plots of first three principal components for Discovery phase.....                                                 | 16        |
| Supplementary Figure 5. Linkage Disequilibrium (LD) plot of significant SNPs from Discovery phase.....                                     | 17        |
| Supplementary Figure 6. MDS and admixture plots for African American replication.....                                                      | 18        |
| Supplementary Figure 7. Conditional association results for genotyped and imputed SNPs at 6q16.....                                        | 19        |
| Supplementary Figure 8. Association results for genotyped and imputed SNPs at 6q16 conditioned on both rs4336470 and rs17065417.....       | 20        |
| Supplementary Figure 9. <i>LIN28B</i> expressed higher in neuroblastoma compared to most other pediatric cancers.....                      | 21        |
| Supplementary Figure 10. <i>HACE1</i> and <i>LIN28B</i> expression are associated with disease stage in neuroblastoma.....                 | 22        |
| Supplementary Figure 11. Decreased <i>HACE1</i> expression is associated with advanced stage disease and poor overall survival.....        | 23        |
| Supplementary Figure 12. Decreased <i>HACE1</i> expression associated with disease progression in high-risk MYCN non-amplified tumors..... | 24        |
| <b>III. SUPPLEMENTARY REFERENCES .....</b>                                                                                                 | <b>25</b> |

## I. SUPPLEMENTARY TABLES

Supplementary Table 1. Neuroblastoma patient characteristics.

| Characteristic    | Discovery <sup>§</sup><br>(European Ancestry)<br>Blood DNA<br>n=2,101 | Replication <sup>§</sup><br>(African American)<br>Blood DNA<br>n=365 | Primary<br>Neuroblastomas <sup>§</sup><br>Tumor RNA<br>n=87 |
|-------------------|-----------------------------------------------------------------------|----------------------------------------------------------------------|-------------------------------------------------------------|
| <b>Age</b>        |                                                                       |                                                                      |                                                             |
| < 1 yr            | 736 (36)                                                              | 99 (27)                                                              | 37 (43)                                                     |
| ≥ 1 yr            | 1,324 (64)                                                            | 263 (73)                                                             | 50 (57)                                                     |
| Not Available     | 41                                                                    | 3                                                                    | 0                                                           |
| <b>INSS Stage</b> |                                                                       |                                                                      |                                                             |
| Stage 1           | 388 (20)                                                              | 49 (14)                                                              | 25 (29)                                                     |
| Stage 2           | 272 (14)                                                              | 47 (13)                                                              | 1 (1)                                                       |
| Stage 3           | 327 (16)                                                              | 61 (18)                                                              | 19 (22)                                                     |
| Stage 4           | 875 (44)                                                              | 172 (49)                                                             | 42 (48)                                                     |
| Stage 4S          | 123 (6)                                                               | 22 (6)                                                               | 0 (0)                                                       |
| Not Available     | 116                                                                   | 14                                                                   | 0                                                           |
| <b>MYCN</b>       |                                                                       |                                                                      |                                                             |
| Not Amplified     | 1,566 (82)                                                            | 278 (84)                                                             | 71 (82)                                                     |
| Amplified         | 342 (18)                                                              | 54 (16)                                                              | 16 (18)                                                     |
| Not available     | 193                                                                   | 33                                                                   | 0                                                           |
| <b>Histology</b>  |                                                                       |                                                                      |                                                             |
| Favorable         | 932 (56)                                                              | 139 (49)                                                             | 43 (51)                                                     |
| Unfavorable       | 735 (44)                                                              | 144 (51)                                                             | 41 (49)                                                     |
| Not available     | 434                                                                   | 82                                                                   | 4                                                           |
| <b>DNA index</b>  |                                                                       |                                                                      |                                                             |
| Hyperdiploid      | 616 (66)                                                              | 63 (61)                                                              | 60 (75)                                                     |
| Diploid           | 316 (34)                                                              | 46 (39)                                                              | 20 (25)                                                     |
| Not available     | 1169                                                                  | 246                                                                  | 7                                                           |
| <b>Risk</b>       |                                                                       |                                                                      |                                                             |
| Low               | 705 (36)                                                              | 98 (29)                                                              | 26 (30)                                                     |
| Intermediate      | 386 (20)                                                              | 63 (19)                                                              | 18 (21)                                                     |
| High              | 853 (44)                                                              | 176 (52)                                                             | 43 (49)                                                     |
| Not available     | 157                                                                   | 28                                                                   | 0                                                           |

<sup>§</sup> Frequency within each clinical/biological subset is listed in parentheses.

Supplementary Table 2. Association results at previously reported loci.

| SNP                              | Chr | Position <sup>a</sup> | A1/A2 <sup>b</sup> | A1 Freq in cases | A1 Freq in controls | Allelic P-value | OR <sup>c</sup> |
|----------------------------------|-----|-----------------------|--------------------|------------------|---------------------|-----------------|-----------------|
| <b><i>BARD1</i></b>              |     |                       |                    |                  |                     |                 |                 |
| rs3768716                        | 2   | 215635794             | G/A                | 0.287            | 0.227               | 8.61E-14        | 1.377           |
| rs17487792                       | 2   | 215643500             | T/C                | 0.286            | 0.225               | 1.12E-13        | 1.376           |
| rs7587476                        | 2   | 215653887             | T/C                | 0.309            | 0.246               | 4.14E-14        | 1.372           |
| rs6435862                        | 2   | 215672546             | G/T                | 0.342            | 0.283               | 8.36E-12        | 1.319           |
| rs6744811                        | 2   | 215677308             | C/A                | 0.317            | 0.371               | 1.27E-09        | 0.784           |
| rs2121283                        | 2   | 215710338             | A/G                | 0.314            | 0.365               | 1.18E-08        | 0.795           |
| rs11677798                       | 2   | 215724550             | T/C                | 0.366            | 0.416               | 3.70E-08        | 0.807           |
| rs2592232                        | 2   | 215725751             | C/T                | 0.370            | 0.309               | 1.26E-11        | 1.309           |
| rs10498025                       | 2   | 215749256             | G/A                | 0.311            | 0.254               | 9.40E-12        | 1.328           |
| rs10498026                       | 2   | 215749350             | A/G                | 0.413            | 0.476               | 2.40E-11        | 0.775           |
| <b><i>LINC00340/FLJ44180</i></b> |     |                       |                    |                  |                     |                 |                 |
| rs4712653                        | 6   | 22125964              | C/T                | 0.534            | 0.459               | 1.69E-15        | 1.354           |
| rs9295536                        | 6   | 22131929              | A/C                | 0.506            | 0.430               | 7.82E-16        | 1.357           |
| rs6939340                        | 6   | 22140004              | A/G                | 0.451            | 0.524               | 1.74E-14        | 0.747           |
| <b><i>LMO1</i></b>               |     |                       |                    |                  |                     |                 |                 |
| rs4758051                        | 11  | 8238639               | G/A                | 0.511            | 0.452               | 3.83E-10        | 1.267           |
| rs110419                         | 11  | 8252853               | G/A                | 0.441            | 0.511               | 1.26E-13        | 0.755           |
| <b><i>HSD17B12</i></b>           |     |                       |                    |                  |                     |                 |                 |
| rs11037575                       | 11  | 43671734              | C/T                | 0.458            | 0.407               | 4.89E-08        | 1.231           |

<sup>a</sup> Human genome build hg19.<sup>b</sup> A1: Allele 1; A2: Allele 2.<sup>c</sup> OR: odds ratio (cases versus controls for A1).

Supplementary Table 3. Genotype counts and statistical significance for 6q16 SNPs.

| SNP<br>(Gene)                 | Genotype<br>Allele | Discovery <sup>*</sup> |                        |                        | Italian Replication <sup>*</sup> |                       |                | African American Replication <sup>*</sup> |                        |                        | Combined                |                                           |
|-------------------------------|--------------------|------------------------|------------------------|------------------------|----------------------------------|-----------------------|----------------|-------------------------------------------|------------------------|------------------------|-------------------------|-------------------------------------------|
|                               |                    | Cases<br>(N = 2101)    | Controls<br>(N = 4202) | P <sup>€</sup>         | Cases<br>(N = 351)               | Controls<br>(N = 780) | P <sup>€</sup> | Cases<br>(N = 365)                        | Controls<br>(N = 2491) | P <sup>*†</sup>        | Meta<br>P <sup>€</sup>  | OR <sup>§</sup><br>(95% CI <sup>¶</sup> ) |
| <b>rs4336470</b><br>(HACE1)   | CC                 | 1034 (49.5)            | 1772 (42.4)            | 1.8 x 10 <sup>-8</sup> | 176 (50.3)                       | 348 (44.6)            | 0.06           | 58 (16.0)                                 | 237 (9.5)              | 1.4 x 10 <sup>-3</sup> | 2.7 x 10 <sup>-11</sup> | 1.26<br>(1.18-1.35)                       |
|                               | CT                 | 870 (41.6)             | 1917 (45.8)            |                        | 136 (38.9)                       | 329 (42.2)            |                | 157 (43.1)                                | 1035(41.6)             |                        |                         |                                           |
|                               | TT                 | 186 (8.9)              | 494 (11.8)             |                        | 38 (10.8)                        | 103 (13.2)            |                | 149 (40.9)                                | 1215 (48.9)            |                        |                         |                                           |
|                               | C                  | 2938 (70.3)            | 5461 (65.3)            |                        | 488 (69.7)                       | 1025 (65.7)           |                | 273 (37.5)                                | 1509 (30.3)            |                        |                         |                                           |
|                               | T                  | 1242 (29.7)            | 2905 (34.7)            |                        | 212 (30.3)                       | 535 (34.3)            |                | 455 (62.5)                                | 3465 (69.7)            |                        |                         |                                           |
| <b>rs9404576</b><br>(HACE1)   | TT                 | 1032 (49.3)            | 1772 (42.3)            | 3.4 x 10 <sup>-8</sup> |                                  |                       |                | 58 (15.9)                                 | 236 (9.5)              | 1.3 x 10 <sup>-3</sup> | 1.8 x 10 <sup>-10</sup> | 1.27<br>(1.18-1.36)                       |
|                               | TG                 | 875 (41.8)             | 1924 (46.0)            |                        |                                  |                       |                | 158 (43.3)                                | 1038(41.6)             |                        |                         |                                           |
|                               | GG                 | 186 (8.9)              | 491 (11.7)             |                        |                                  |                       |                | 149 (40.8)                                | 1216 (48.9)            |                        |                         |                                           |
|                               | T                  | 2939 (70.2)            | 5468 (65.3)            |                        |                                  |                       |                | 274 (37.5)                                | 1510 (30.3)            |                        |                         |                                           |
|                               | G                  | 1247 (29.8)            | 2906 (34.7)            |                        |                                  |                       |                | 456 (62.5)                                | 3470 (69.7)            |                        |                         |                                           |
| <b>rs4079063</b><br>(HACE1)   | AA                 | 695 (33.3)             | 1190 (28.4)            | 4.0 x 10 <sup>-5</sup> |                                  |                       |                | 37 (10.2)                                 | 143 (5.8)              | 1.3 x 10 <sup>-4</sup> | 1.3 x 10 <sup>-7</sup>  | 1.20<br>(1.12-1.29)                       |
|                               | AG                 | 1003 (48.1)            | 2098 (50.2)            |                        |                                  |                       |                | 143 (39.3)                                | 806 (32.7)             |                        |                         |                                           |
|                               | GG                 | 387 (18.6)             | 896 (21.4)             |                        |                                  |                       |                | 184 (50.5)                                | 1517 (61.5)            |                        |                         |                                           |
|                               | A                  | 2393 (57.4)            | 4478 (53.5)            |                        |                                  |                       |                | 217 (29.8)                                | 1092 (22.1)            |                        |                         |                                           |
|                               | G                  | 1777 (42.6)            | 3890 (46.5)            |                        |                                  |                       |                | 511 (70.2)                                | 3840 (77.9)            |                        |                         |                                           |
| <b>rs2499663</b><br>(HACE1)   | CC                 | 696 (33.1)             | 1190 (28.3)            | 4.5 x 10 <sup>-5</sup> |                                  |                       |                | 38 (10.4)                                 | 144 (5.8)              | 1.5 x 10 <sup>-4</sup> | 1.6 x 10 <sup>-7</sup>  | 1.21<br>(1.13-1.29)                       |
|                               | CT                 | 1015 (48.3)            | 2112 (50.3)            |                        |                                  |                       |                | 143 (39.2)                                | 829 (33.3)             |                        |                         |                                           |
|                               | TT                 | 389 (18.6)             | 898 (21.4)             |                        |                                  |                       |                | 184 (50.4)                                | 1518 (60.9)            |                        |                         |                                           |
|                               | C                  | 2407 (57.3)            | 4492 (53.5)            |                        |                                  |                       |                | 219 (30.0)                                | 1117 (22.4)            |                        |                         |                                           |
|                               | T                  | 1793 (42.7)            | 3908 (46.5)            |                        |                                  |                       |                | 511 (70.0)                                | 3865 (77.6)            |                        |                         |                                           |
| <b>rs2499667</b><br>(HACE1)   | AA                 | 702 (33.4)             | 1192 (28.4)            | 2.6 x 10 <sup>-5</sup> |                                  |                       |                | 35 (9.6)                                  | 132 (5.3)              | 2.6 x 10 <sup>-4</sup> | 1.2 x 10 <sup>-7</sup>  | 1.21<br>(1.13-1.29)                       |
|                               | AG                 | 1011 (48.2)            | 2116 (50.3)            |                        |                                  |                       |                | 142 (38.9)                                | 821 (33.0)             |                        |                         |                                           |
|                               | GG                 | 387 (18.4)             | 894 (21.3)             |                        |                                  |                       |                | 188 (51.5)                                | 1538 (61.7)            |                        |                         |                                           |
|                               | A                  | 2415 (57.5)            | 4500 (53.5)            |                        |                                  |                       |                | 212 (29.0)                                | 1085 (21.8)            |                        |                         |                                           |
|                               | G                  | 1785 (42.5)            | 3904 (46.5)            |                        |                                  |                       |                | 511 (71.0)                                | 3897 (78.2)            |                        |                         |                                           |
| <b>rs17065417</b><br>(LIN28B) | AA                 | 1785 (85.0)            | 3337 (79.4)            | 1.8 x 10 <sup>-7</sup> | 298 (84.9)                       | 600 (78.6)            | 0.03           | 300 (82.2)                                | 1952 (78.4)            | 0.129                  | 1.2 x 10 <sup>-8</sup>  | 1.38<br>(1.23-1.54)                       |
|                               | AC                 | 299 (14.2)             | 815 (19.4)             |                        | 48 (13.7)                        | 155 (20.3)            |                | 61 (16.7)                                 | 507 (20.3)             |                        |                         |                                           |
|                               | CC                 | 17 (0.8)               | 49 (1.2)               |                        | 5 (1.4)                          | 8 (1.1)               |                | 4 (1.1)                                   | 32 (1.3)               |                        |                         |                                           |
|                               | A                  | 3869 (92.1)            | 7489 (89.1)            |                        | 644 (92.0)                       | 1355 (88.8)           |                | 661 (90.6)                                | 4411 (88.5)            |                        |                         |                                           |
|                               | C                  | 333 (7.9)              | 913 (10.9)             |                        | 58 (8.0)                         | 171 (11.2)            |                | 69 (9.4)                                  | 571 (11.5)             |                        |                         |                                           |

\* No deviations from Hardy-Weinberg equilibrium were observed (P&gt;0.001) in all cohorts

€ P-values were calculated by allelic test

\* P-value calculated by logistic regression with percent African admixture as covariate<sup>9</sup>€ Meta-analysis P-value using METAL<sup>10</sup>

§ OR: odds ratio of risk allele based on meta-analysis

\* CI: confidence interval

**Supplementary Table 4. Association results for 6q16 SNPs with first 20 PCs as covariates.**

| SNP        | A1/A2<br>(protective/<br>risk allele) | Discovery cohort<br>European Ancestry |                                 |                           |                                          |
|------------|---------------------------------------|---------------------------------------|---------------------------------|---------------------------|------------------------------------------|
|            |                                       | Freq A1<br>Cases<br>(n=2101)          | Freq A1<br>Controls<br>(n=4202) | Allelic<br>P <sup>a</sup> | Logistic<br>Regression<br>P <sup>b</sup> |
| rs4336470  | T/C                                   | 0.30                                  | 0.35                            | $1.8 \times 10^{-8}$      | $2.8 \times 10^{-8}$                     |
| rs9404576  | G/T                                   | 0.30                                  | 0.35                            | $3.4 \times 10^{-8}$      | $3.4 \times 10^{-8}$                     |
| rs4079063  | G/A                                   | 0.43                                  | 0.47                            | $4.0 \times 10^{-5}$      | $3.3 \times 10^{-5}$                     |
| rs2499663  | C/T                                   | 0.43                                  | 0.47                            | $4.5 \times 10^{-5}$      | $3.5 \times 10^{-5}$                     |
| rs2499667  | G/A                                   | 0.43                                  | 0.47                            | $2.6 \times 10^{-5}$      | $1.7 \times 10^{-5}$                     |
| rs17065417 | C/A                                   | 0.08                                  | 0.11                            | $1.8 \times 10^{-7}$      | $4.5 \times 10^{-6}$                     |

<sup>a</sup> Standard Chi-square test for allelic association.

<sup>b</sup> Logistic regression with first twenty principal components (PCs) as covariates.

**Supplementary Table 5. Association results for 6q16 SNPs conditioned on rs4336470.**

| <b>SNP</b> | <b>BP<sup>a</sup></b> | <b>Discovery<br/>P-value<sup>b</sup></b> | <b>Italian<br/>Replication<br/>P-value<sup>b</sup></b> | <b>African American<br/>Replication<br/>P-value<sup>c</sup></b> |
|------------|-----------------------|------------------------------------------|--------------------------------------------------------|-----------------------------------------------------------------|
| rs4336470  | 105180785             | N/A <sup>d</sup>                         | N/A <sup>d</sup>                                       | N/A <sup>d</sup>                                                |
| rs9404576  | 105184640             | N/A <sup>d</sup>                         | -                                                      | 0.86                                                            |
| rs4079063  | 105266118             | 0.69                                     | -                                                      | 0.06                                                            |
| rs2499663  | 105300570             | 0.65                                     | -                                                      | 0.05                                                            |
| rs2499667  | 105319125             | 0.83                                     | -                                                      | 0.07                                                            |
| rs17065417 | 105406274             | $2.5 \times 10^{-4}$                     | 0.07                                                   | 0.19                                                            |

<sup>a</sup> Human genome build hg19.

<sup>b</sup> Logistic regression conditioned on rs4336470.

<sup>c</sup> Logistic regression with percent African admixture as covariate, conditioned on rs4336470.

<sup>d</sup> N/A: not available; SNP is conditioning SNP or is in complete linkage with conditioning SNP.

**Supplementary Table 6. Correlation of rs4336470 genotypes (CC, TC, TT) with clinical variables.**

|                               | CC <sup>1</sup> | CT <sup>1</sup> | TT <sup>1</sup> | P-value <sup>2</sup> |          |
|-------------------------------|-----------------|-----------------|-----------------|----------------------|----------|
|                               |                 |                 |                 | CC vs TT             | CT vs TT |
| <b>Stage 4</b>                | 438 (50%)       | 357 (41%)       | 77 (9%)         | 1.000                | 0.4464   |
| <b>Not Stage 4</b>            | 536 (49%)       | 471 (43%)       | 95 (9%)         |                      |          |
| <b>MYCN Amp</b>               | 176 (51%)       | 130 (38%)       | 36 (11%)        | 0.3932               | 0.1851   |
| <b>MYCN Not Amp</b>           | 760 (49%)       | 665 (43%)       | 130 (8%)        |                      |          |
| <b>High risk</b>              | 420 (50%)       | 350 (41%)       | 78 (9%)         | 0.5557               | 0.9616   |
| <b>Not High risk</b>          | 540 (50%)       | 454 (42%)       | 90 (9%)         |                      |          |
| <b>DNA Index Hyperdiploid</b> | 238 (42%)       | 264 (46%)       | 62 (11%)        | 0.0246               | 0.0324   |
| <b>DNA Index Diploid</b>      | 161 (51%)       | 129 (41%)       | 23 (7%)         |                      |          |
| <b>Unfavorable Histology</b>  | 370 (51%)       | 298 (41%)       | 62 (8%)         | 0.9269               | 0.9172   |
| <b>Favorable Histology</b>    | 467 (51%)       | 382 (41%)       | 77 (8%)         |                      |          |
| <b>Age &gt;= 1 year</b>       | 648 (49%)       | 546 (42%)       | 120 (9%)        | 0.5543               | 0.8849   |
| <b>Age &lt; 1 year</b>        | 364 (50%)       | 311 (42%)       | 60 (8%)         |                      |          |

1: The CC, CT and TT genotypes represent homozygous risk genotype, heterozygous risk genotype and homozygous non-risk (protective) genotype, respectively.

2: Two-sided Fisher's exact test.



**Supplementary Table 7. Correlation of rs17065417 genotypes (AA, AC, CC) with clinical variables.**

|                               | AA <sup>1</sup> | AC <sup>1</sup> | CC <sup>1</sup> | P-value <sup>2</sup> |          |
|-------------------------------|-----------------|-----------------|-----------------|----------------------|----------|
|                               |                 |                 |                 | AA vs CC             | AC vs CC |
| <b>Stage 4</b>                | 741 (85%)       | 129 (14%)       | 5 (1%)          | 0.5986               | 0.5881   |
| <b>Not Stage 4</b>            | 941 (85%)       | 157 (14%)       | 9 (1%)          |                      |          |
| <b>MYCN Amp</b>               | 281 (83%)       | 56 (17%)        | 2 (<1%)         | 0.2315               | 0.2846   |
| <b>MYCN Not Amp</b>           | 1311 (86%)      | 214 (14%)       | 3 (<1%)         |                      |          |
| <b>High risk</b>              | 722 (85%)       | 127 (15%)       | 4 (<1%)         | 0.4108               | 0.3963   |
| <b>Not High risk</b>          | 928 (85%)       | 152 (14%)       | 9 (1%)          |                      |          |
| <b>DNA Index Hyperdiploid</b> | 509 (84%)       | 96 (16%)        | 0 (0%)          | n.a.                 | n.a.     |
| <b>DNA Index Diploid</b>      | 276 (89%)       | 32 (10%)        | 1 (<1%)         |                      |          |
| <b>Unfavorable Histology</b>  | 629 (86%)       | 101 (14%)       | 3 (<1%)         | 0.6641               | 0.3845   |
| <b>Favorable Histology</b>    | 757 (85%)       | 133 (15%)       | 2 (<1%)         |                      |          |
| <b>Age &gt;= 1 year</b>       | 1121 (85%)      | 189 (14%)       | 11 (1%)         | 0.6014               | 0.7939   |
| <b>Age &lt; 1 year</b>        | 624 (85%)       | 107 (15%)       | 5 (<1%)         |                      |          |

1: The CC, CT and TT genotypes represent homozygous risk genotype, heterozygous risk genotype and homozygous non-risk (protective) genotype, respectively.

2: Two-sided Fisher's exact test

**Supplementary Table 8. Pairwise interaction between most significant SNPs at five loci (case/control).**

| CHR1 | SNP1       | GENE1     | CHR2 | SNP2       | GENE2     | OR    | P <sup>a</sup>     |
|------|------------|-----------|------|------------|-----------|-------|--------------------|
| 2    | rs7587476  | BARD1     | 6    | rs9295536  | LINC00340 | 1.101 | 0.109              |
| 2    | rs7587476  | BARD1     | 6    | rs4336470  | HACE1     | 0.905 | 0.127              |
| 2    | rs7587476  | BARD1     | 6    | rs17065417 | LIN28B    | 0.942 | 0.577              |
| 2    | rs7587476  | BARD1     | 11   | rs110419   | LMO1      | 1.009 | 0.879              |
| 2    | rs7587476  | BARD1     | 11   | rs11037575 | HSD17B12  | 1.063 | 0.309              |
| 6    | rs9295536  | LINC00340 | 6    | rs4336470  | HACE1     | 0.963 | 0.520              |
| 6    | rs9295536  | LINC00340 | 6    | rs17065417 | LIN28B    | 0.936 | 0.495              |
| 6    | rs9295536  | LINC00340 | 11   | rs110419   | LMO1      | 0.914 | 0.099              |
| 6    | rs9295536  | LINC00340 | 11   | rs11037575 | HSD17B12  | 1.001 | 0.988              |
| 6    | rs4336470  | HACE1     | 6    | rs17065417 | LIN28B    | 0.998 | 0.984              |
| 6    | rs4336470  | HACE1     | 11   | rs110419   | LMO1      | 1.082 | 0.176              |
| 6    | rs4336470  | HACE1     | 11   | rs11037575 | HSD17B12  | 0.999 | 0.990              |
| 6    | rs17065417 | LIN28B    | 11   | rs110419   | LMO1      | 1.231 | 0.028 <sup>b</sup> |
| 6    | rs17065417 | LIN28B    | 11   | rs11037575 | HSD17B12  | 0.909 | 0.311              |
| 11   | rs110419   | LMO1      | 11   | rs11037575 | HSD17B12  | 0.940 | 0.252              |

<sup>a</sup> P-value from --epistasis option in plink.

<sup>b</sup> P-value not significant after Bonferroni adjustment for multiple testing (P = 0.420)

**Supplementary Table 9. Pairwise interaction between most significant SNPs at five loci (case-only).**

| CHR1 | SNP1       | GENE1     | CHR2 | SNP2       | GENE2     | P <sup>a</sup>           |
|------|------------|-----------|------|------------|-----------|--------------------------|
| 2    | rs7587476  | BARD1     | 6    | rs9295536  | LINC00340 | <b>0.002<sup>c</sup></b> |
| 2    | rs7587476  | BARD1     | 6    | rs4336470  | HACE1     | 0.089                    |
| 2    | rs7587476  | BARD1     | 6    | rs17065417 | LIN28B    | 0.343                    |
| 2    | rs7587476  | BARD1     | 11   | rs110419   | LMO1      | 0.618                    |
| 2    | rs7587476  | BARD1     | 11   | rs11037575 | HSD17B12  | 0.195                    |
| 6    | rs9295536  | LINC00340 | 6    | rs4336470  | HACE1     | 0.975                    |
| 6    | rs9295536  | LINC00340 | 6    | rs17065417 | LIN28B    | 0.528                    |
| 6    | rs9295536  | LINC00340 | 11   | rs110419   | LMO1      | 0.349                    |
| 6    | rs9295536  | LINC00340 | 11   | rs11037575 | HSD17B12  | 0.733                    |
| 6    | rs4336470  | HACE1     | 6    | rs17065417 | LIN28B    | n/a <sup>b</sup>         |
| 6    | rs4336470  | HACE1     | 11   | rs110419   | LMO1      | 0.433                    |
| 6    | rs4336470  | HACE1     | 11   | rs11037575 | HSD17B12  | 0.325                    |
| 6    | rs17065417 | LIN28B    | 11   | rs110419   | LMO1      | 0.098                    |
| 6    | rs17065417 | LIN28B    | 11   | rs11037575 | HSD17B12  | 0.259                    |
| 11   | rs110419   | LMO1      | 11   | rs11037575 | HSD17B12  | 0.715                    |

<sup>a</sup> P-value from --epistasis option in plink.

<sup>b</sup> Interaction test for rs4336470 and rs17065417 not reported due to insufficient numbers.

<sup>c</sup> Interaction remains significant after Bonferroni adjustment (P = 0.028).

**Supplementary Table 10. Genotyped and imputed SNP associations at 6q16 ( $P < 1 \times 10^{-6}$ ).**

| Identifier  | Position <sup>1</sup> | Major Allele <sup>2</sup> | Minor Allele <sup>2</sup> | Cases MAF <sup>3</sup> | Controls MAF <sup>3</sup> | OR <sup>4</sup> | OR Lower | OR Upper | P-value <sup>5</sup> |
|-------------|-----------------------|---------------------------|---------------------------|------------------------|---------------------------|-----------------|----------|----------|----------------------|
| 6-105142638 | 105142638             | C                         | G                         | 0.40                   | 0.45                      | 0.810           | 0.747    | 0.878    | 3.75E-07             |
| 6-105146360 | 105146360             | G                         | T                         | 0.40                   | 0.45                      | 0.812           | 0.750    | 0.880    | 3.99E-07             |
| 6-105146656 | 105146656             | T                         | C                         | 0.40                   | 0.46                      | 0.810           | 0.748    | 0.877    | 2.90E-07             |
| 6-105147784 | 105147784             | G                         | A                         | 0.03                   | 0.05                      | 0.585           | 0.475    | 0.721    | 2.84E-07             |
| 6-105149439 | 105149439             | T                         | C                         | 0.40                   | 0.45                      | 0.811           | 0.749    | 0.878    | 3.14E-07             |
| 6-105149713 | 105149713             | C                         | G                         | 0.40                   | 0.45                      | 0.811           | 0.749    | 0.878    | 3.17E-07             |
| 6-105154880 | 105154880             | G                         | A                         | 0.40                   | 0.45                      | 0.813           | 0.751    | 0.880    | 3.89E-07             |
| 6-105155782 | 105155782             | C                         | A                         | 0.40                   | 0.45                      | 0.817           | 0.754    | 0.885    | 7.27E-07             |
| 6-105158405 | 105158405             | T                         | C                         | 0.40                   | 0.45                      | 0.815           | 0.752    | 0.882    | 5.19E-07             |
| 6-105158634 | 105158634             | T                         | A                         | 0.40                   | 0.45                      | 0.815           | 0.753    | 0.883    | 5.52E-07             |
| 6-105173726 | 105173726             | G                         | A                         | 0.30                   | 0.35                      | 0.795           | 0.734    | 0.861    | 1.40E-08             |
| 6-105174273 | 105174273             | T                         | C                         | 0.30                   | 0.35                      | 0.795           | 0.734    | 0.861    | 1.40E-08             |
| 6-105175533 | 105175533             | C                         | T                         | 0.33                   | 0.38                      | 0.796           | 0.731    | 0.866    | 1.23E-07             |
| rs4336470   | 105180785             | C                         | T                         | 0.30                   | 0.35                      | 0.795           | 0.733    | 0.861    | 1.47E-08             |
| rs9404576   | 105184640             | T                         | G                         | 0.30                   | 0.35                      | 0.798           | 0.737    | 0.865    | 2.62E-08             |
| 6-105185421 | 105185421             | T                         | C                         | 0.40                   | 0.44                      | 0.820           | 0.758    | 0.888    | 8.85E-07             |
| 6-105185807 | 105185807             | C                         | G                         | 0.31                   | 0.36                      | 0.812           | 0.750    | 0.880    | 2.55E-07             |
| 6-105190335 | 105190335             | T                         | G                         | 0.29                   | 0.34                      | 0.804           | 0.741    | 0.872    | 1.27E-07             |
| 6-105191814 | 105191814             | C                         | T                         | 0.32                   | 0.36                      | 0.815           | 0.753    | 0.882    | 2.94E-07             |
| 6-105194651 | 105194651             | A                         | G                         | 0.30                   | 0.35                      | 0.795           | 0.734    | 0.861    | 1.41E-08             |
| 6-105197091 | 105197091             | G                         | T                         | 0.30                   | 0.35                      | 0.795           | 0.734    | 0.861    | 1.42E-08             |
| 6-105197874 | 105197874             | A                         | G                         | 0.30                   | 0.35                      | 0.796           | 0.735    | 0.862    | 1.57E-08             |
| 6-105232233 | 105232233             | A                         | C                         | 0.31                   | 0.36                      | 0.815           | 0.753    | 0.883    | 3.36E-07             |
| 6-105235757 | 105235757             | A                         | G                         | 0.31                   | 0.36                      | 0.815           | 0.753    | 0.883    | 3.36E-07             |
| 6-105358164 | 105358164             | G                         | A                         | 0.12                   | 0.15                      | 0.751           | 0.671    | 0.841    | 7.79E-07             |
| 6-105360252 | 105360252             | C                         | A                         | 0.12                   | 0.15                      | 0.751           | 0.671    | 0.840    | 6.70E-07             |
| 6-105362716 | 105362716             | T                         | C                         | 0.12                   | 0.15                      | 0.755           | 0.674    | 0.844    | 9.96E-07             |
| 6-105404562 | 105404562             | A                         | C                         | 0.08                   | 0.10                      | 0.697           | 0.609    | 0.798    | 1.11E-07             |
| rs17065417  | 105406274             | A                         | C                         | 0.08                   | 0.11                      | 0.706           | 0.619    | 0.805    | 1.24E-07             |
| 6-105406324 | 105406324             | C                         | T                         | 0.07                   | 0.10                      | 0.700           | 0.611    | 0.801    | 1.69E-07             |
| 6-105415911 | 105415911             | G                         | A                         | 0.08                   | 0.11                      | 0.704           | 0.616    | 0.805    | 1.88E-07             |
| 6-105419286 | 105419286             | T                         | A                         | 0.08                   | 0.11                      | 0.698           | 0.610    | 0.799    | 1.06E-07             |
| 6-105425731 | 105425731             | G                         | A                         | 0.04                   | 0.06                      | 0.592           | 0.487    | 0.720    | 5.72E-08             |
| 6-105430503 | 105430503             | A                         | T                         | 0.08                   | 0.11                      | 0.698           | 0.610    | 0.798    | 1.04E-07             |
| 6-105432994 | 105432994             | G                         | C                         | 0.08                   | 0.11                      | 0.705           | 0.617    | 0.806    | 2.06E-07             |
| 6-105434907 | 105434907             | A                         | G                         | 0.08                   | 0.11                      | 0.698           | 0.610    | 0.798    | 1.04E-07             |
| 6-105436993 | 105436993             | G                         | A                         | 0.08                   | 0.11                      | 0.698           | 0.610    | 0.798    | 1.04E-07             |
| 6-105439354 | 105439354             | A                         | G                         | 0.08                   | 0.11                      | 0.703           | 0.616    | 0.802    | 1.09E-07             |
| 6-105441404 | 105441404             | T                         | G                         | 0.08                   | 0.11                      | 0.698           | 0.610    | 0.798    | 1.04E-07             |
| 6-105444115 | 105444115             | T                         | C                         | 0.08                   | 0.11                      | 0.698           | 0.610    | 0.798    | 1.04E-07             |
| 6-105454799 | 105454799             | T                         | A                         | 0.08                   | 0.11                      | 0.702           | 0.614    | 0.803    | 1.59E-07             |
| 6-105462201 | 105462201             | T                         | A                         | 0.08                   | 0.10                      | 0.703           | 0.615    | 0.804    | 1.89E-07             |
| 6-105469367 | 105469367             | A                         | G                         | 0.07                   | 0.10                      | 0.697           | 0.608    | 0.799    | 1.70E-07             |
| 6-105469476 | 105469476             | C                         | T                         | 0.07                   | 0.10                      | 0.697           | 0.608    | 0.800    | 1.77E-07             |
| 6-105475109 | 105475109             | C                         | T                         | 0.07                   | 0.10                      | 0.693           | 0.604    | 0.796    | 1.22E-07             |
| 6-105480449 | 105480449             | A                         | T                         | 0.06                   | 0.09                      | 0.647           | 0.557    | 0.751    | 5.87E-09             |
| 6-105480607 | 105480607             | A                         | T                         | 0.06                   | 0.09                      | 0.644           | 0.554    | 0.748    | 4.41E-09             |
| 6-105480725 | 105480725             | T                         | C                         | 0.06                   | 0.09                      | 0.646           | 0.557    | 0.751    | 6.37E-09             |
| 6-105480816 | 105480816             | G                         | A                         | 0.06                   | 0.09                      | 0.649           | 0.559    | 0.754    | 9.89E-09             |

1. Human genome build hg19

2. Alleles with respect to forward strand

3. MAF: minor allele frequency

4. Odds ratio with respect to minor allele

5. SNPTTEST p-value

## II. SUPPLEMENTARY FIGURES

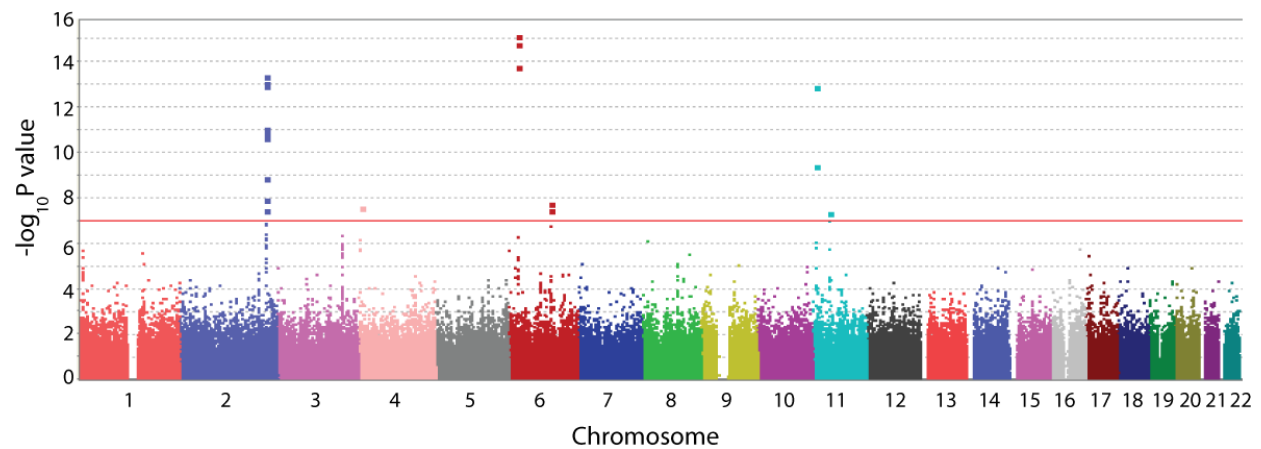

**Supplementary Figure 1. Manhattan plot of discovery results.** Level of significance ( $-\log_{10}$  transformed P values) for each SNP along the genome in chromosomal order is plotted. Red line: genome-wide significance threshold based on Bonferroni adjustment. New association signal identified is at chromosome 6q16.

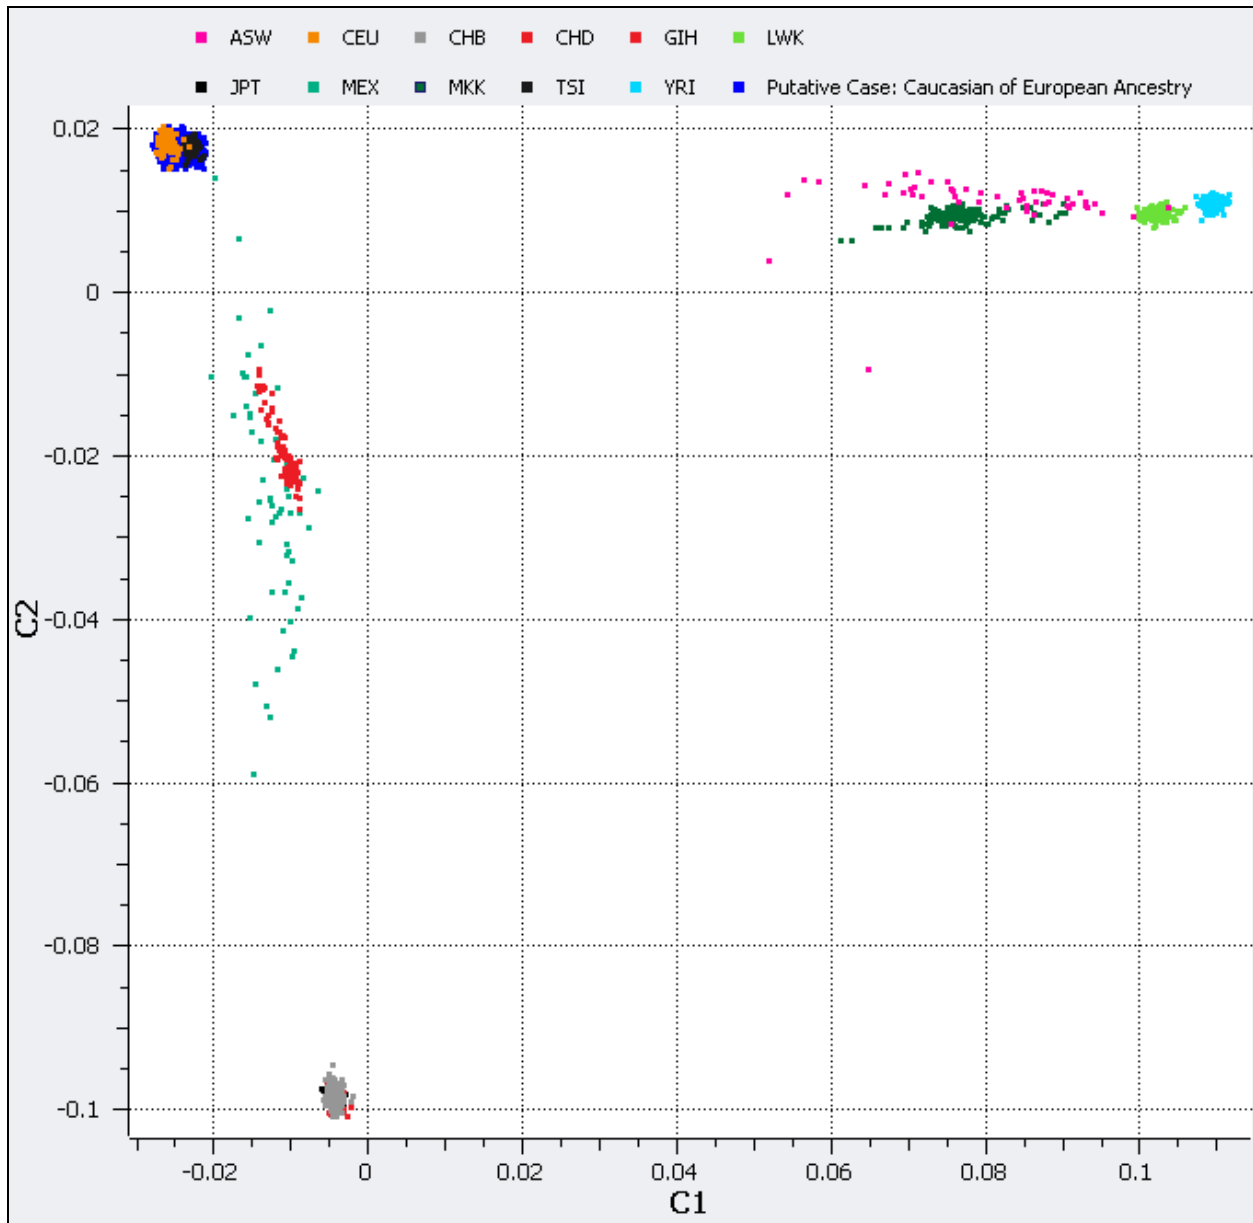

**Supplementary Figure 2. MDS plot of HapMap3 populations and neuroblastoma cases of European Ancestry.** Plot generated from SVS 7.2 Software (Golden Helix; Bozeman, MT).

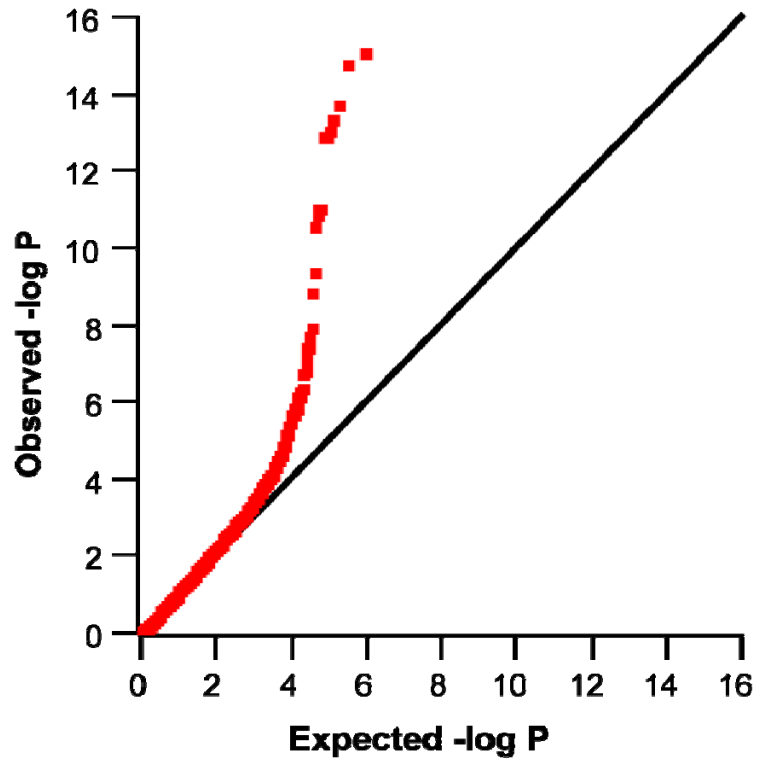

**Supplementary Figure 3. Quantile-Quantile plot of the expected and observed P-values.** SNPs passing quality control in the discovery phase are plotted; known neuroblastoma-associated SNPs have not been removed. The genomic inflation factor is 1.14.

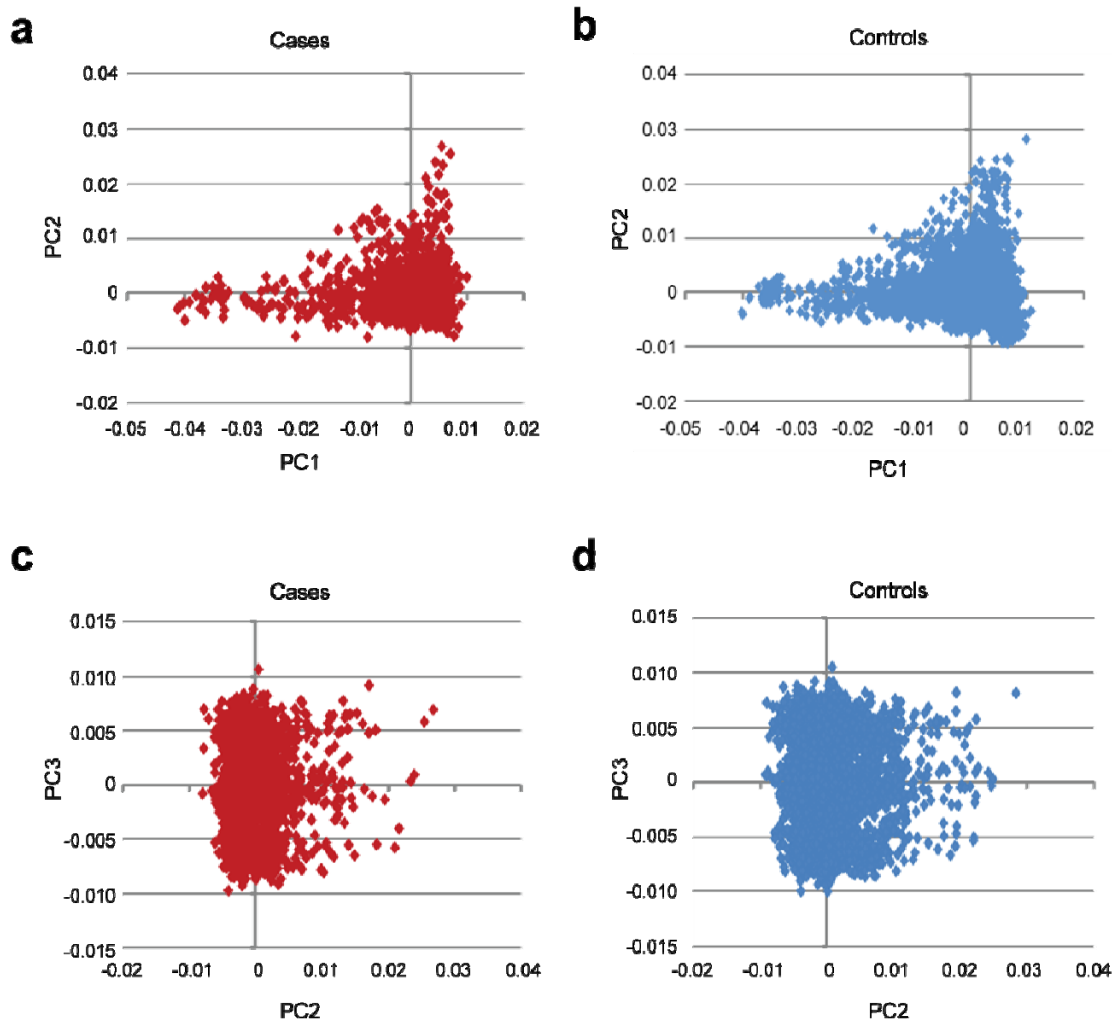

**Supplementary Figure 4. Plots of first three principal components for Discovery phase.** No clear evidence of stratification was observed. Including the first three principal components in a logistic regression analysis did not alter the inflation factor ( $\lambda = 1.136$ ), suggesting the elevated lambda was not the result of gross population stratification issues.



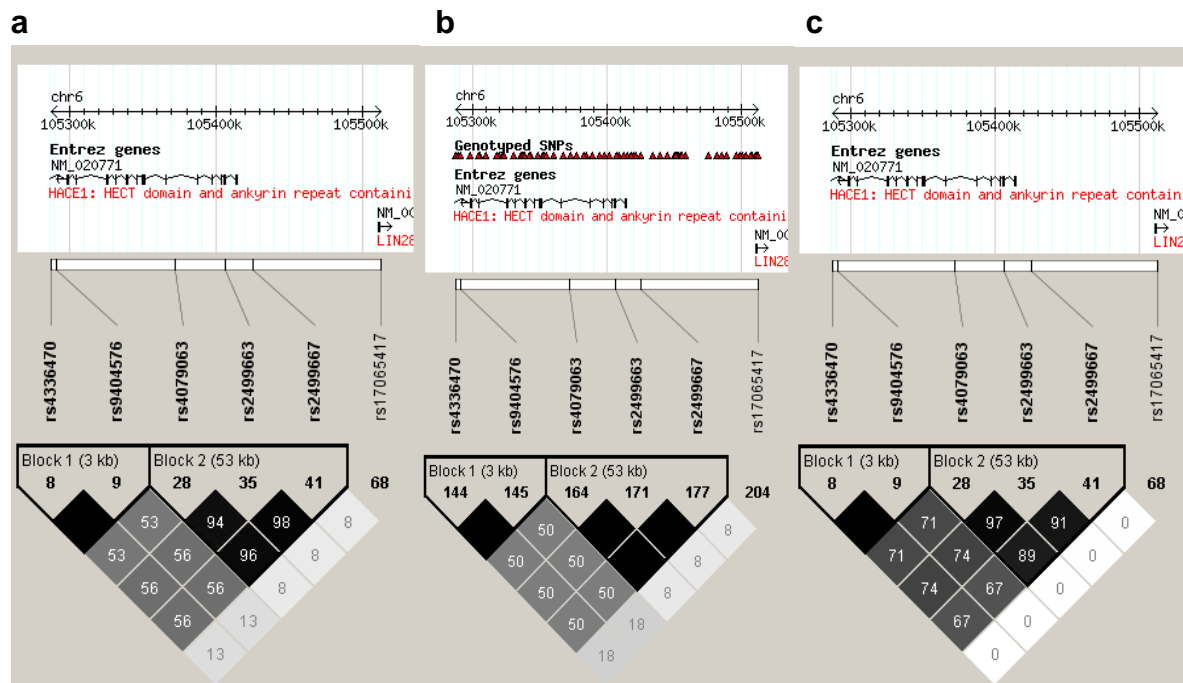

Supplementary Figure 5. Linkage Disequilibrium (LD) plot of significant SNPs from Discovery phase a) HapMap3 CEU population. b) HapMap3 TSI population. c) HapMap3 YRI population.

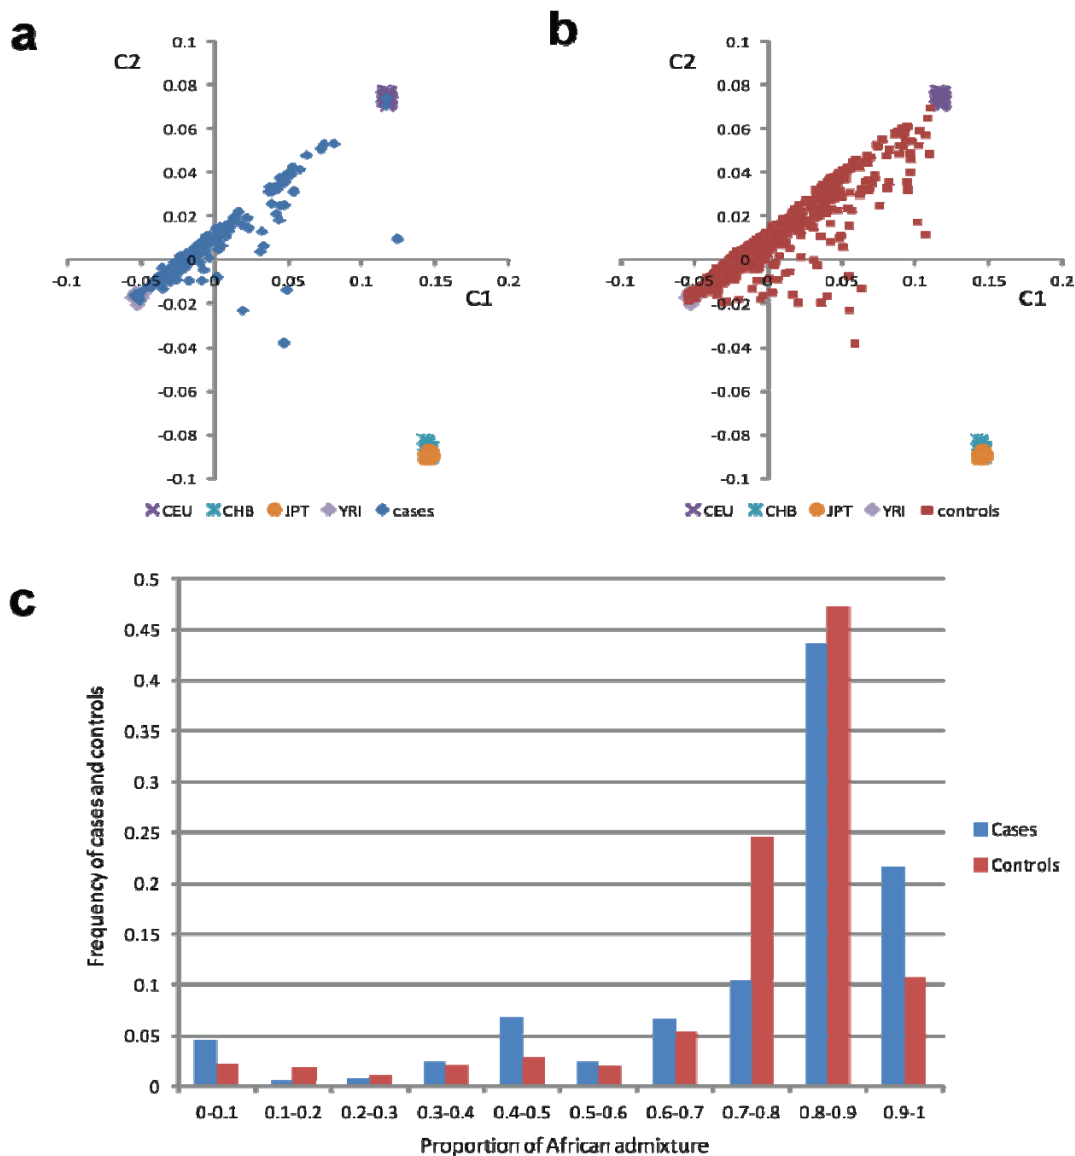

**Supplementary Figure 6. MDS and admixture plots for African American replication.** Plotted are first two components of MDS analysis for cases (a) and controls (b) along with the CEU, CHB, JPT and YRI HapMap populations. (c) Histogram of the proportion of African admixture in cases and controls.

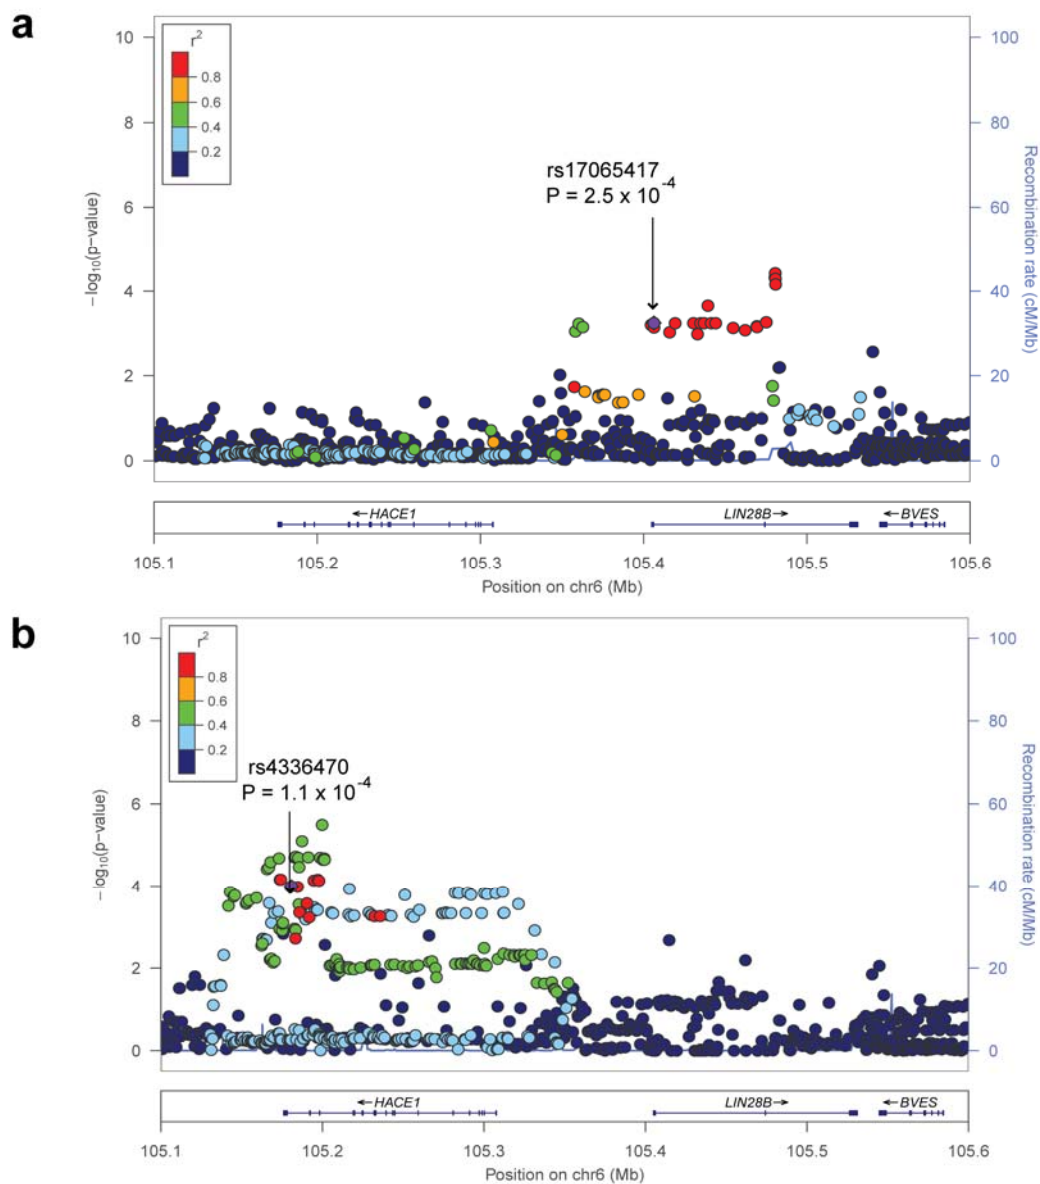

**Supplementary Figure 7. Conditional association results for genotyped and imputed SNPs at 6q16.** Genomic position based on hg19. **a.** conditioned on rs4336470. SNPs mapping within or downstream of *HACE1* are no longer statistically significant indicating they represent a single association signal. P-values for SNPs mapping to *LIN28B* are slightly attenuated but remain highly significant, suggesting they contribute independently to the observed association signal at 6q16. **b.** conditioned on rs17065417.

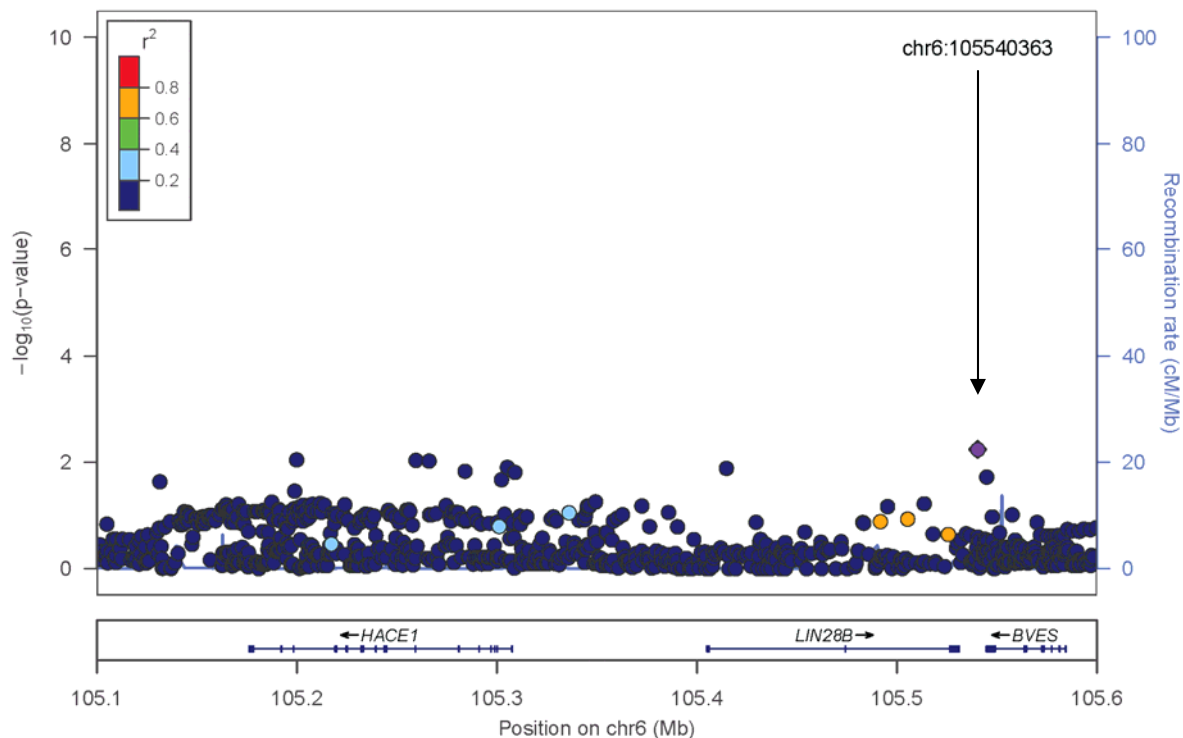

**Supplementary Figure 8. Association results for genotyped and imputed SNPs at 6q16 conditioned on both rs4336470 and rs17065417.** Marker colored purple is the most significant SNP after conditioning, but is no longer significant after adjustment for multiple testing. Association signal across entire region is abolished after conditioning on both rs4336470 and rs17065417. Genomic positions based on hg19.

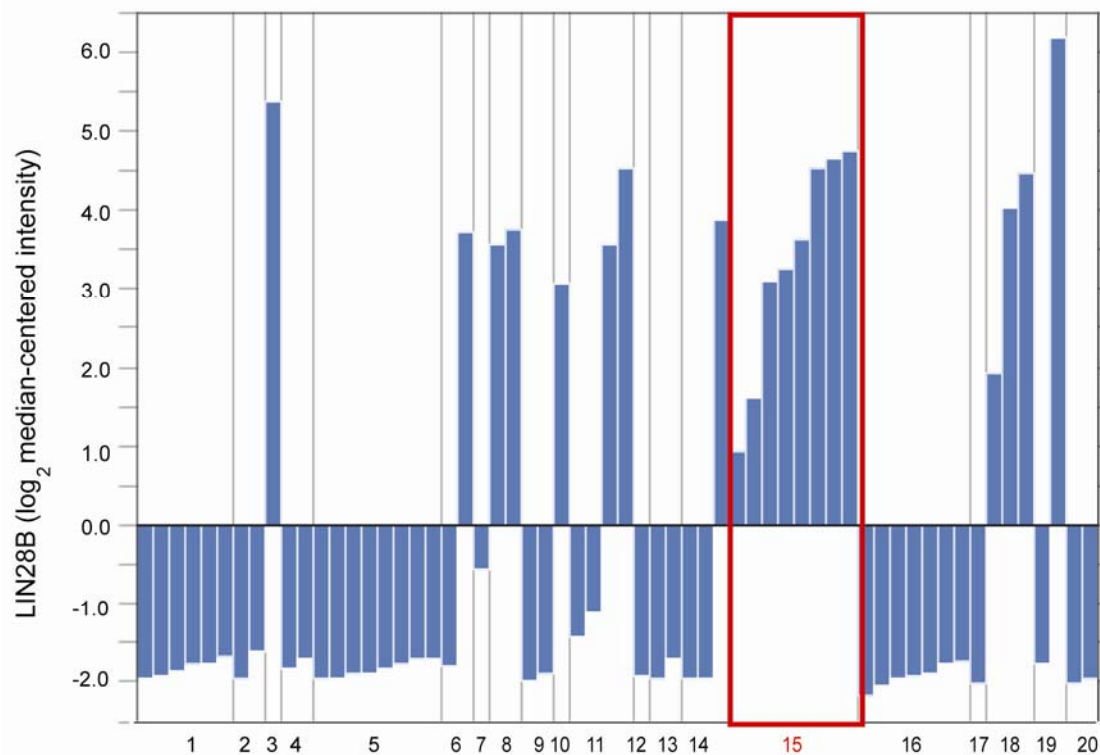

## Legend

- |                                            |                                             |
|--------------------------------------------|---------------------------------------------|
| 1. Alveolar Rhabdomyosarcoma (6)           | 11. Extrasosseus Ewing's Sarcoma (4)        |
| 2. Anaplastic Ependymoma (2)               | 12. Giant Cell Glioblastoma (1)             |
| 3. Anaplastic Renal Wilms Tumor (1)        | 13. Glioblastoma (2)                        |
| 4. Atypical Teratoid/Rhabdoid Tumor (2)    | 14. Medulloblastoma (3)                     |
| 5. B-Cell Acute Lymphoblastic Leukemia (8) | 15. <b>Neuroblastoma (8)</b>                |
| 6. Brain Glioblastoma (2)                  | 16. Osteosarcoma (7)                        |
| 7. Desmoplastic Medulloblastoma (1)        | 17. Pleomorphic Xanthoastrocytoma (1)       |
| 8. Embryonal Rhabdomyosarcoma (2)          | 18. Renal Wilms Tumor (3)                   |
| 9. Ependymoma (2)                          | 19. Rhabdoid Tumor of the Kidney (2)        |
| 10. Ewing's Sarcoma of Bone (1)            | 20. T-Cell Acute Lymphoblastic Leukemia (2) |

**Supplementary Figure 9. *LIN28B* expressed higher in neuroblastoma compared to most other pediatric cancers.** Data from Neale et al.(1) are plotted using Oncomine (<http://www.oncomine.org>).

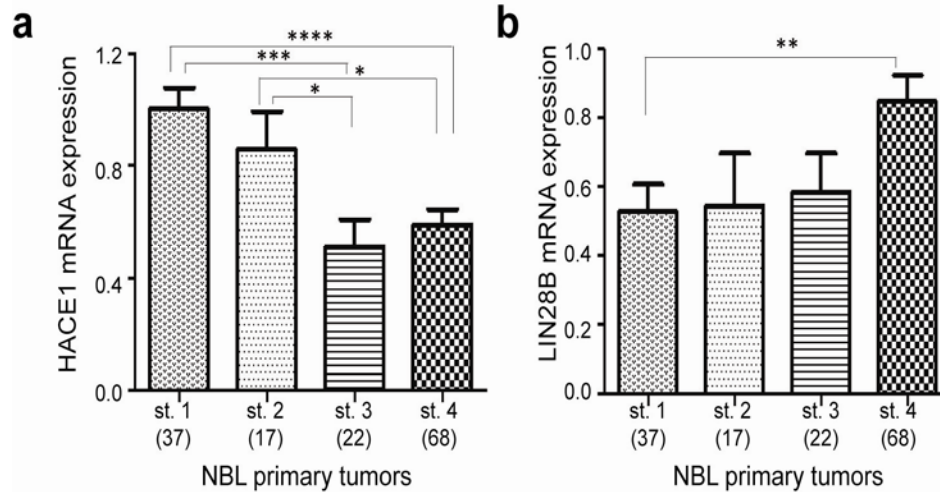

**Supplementary Figure 10. *HACE1* and *LIN28B* expression are associated with disease stage in neuroblastoma.** Expression of *HACE1* (a) and *LIN28B* (b) in 144 primary neuroblastomas is shown according to INSS stage in bar graph format (error bars: SEM). Data are from published cDNA array available through the National Cancer Institute (NCI; <http://home.ccr.cancer.gov/oncology/oncogenomics>). \*\*\*\*  $P < 0.0001$ , \*\*\*  $P < 0.001$ ; \*\*  $P < 0.01$ , \*  $P < 0.05$ .

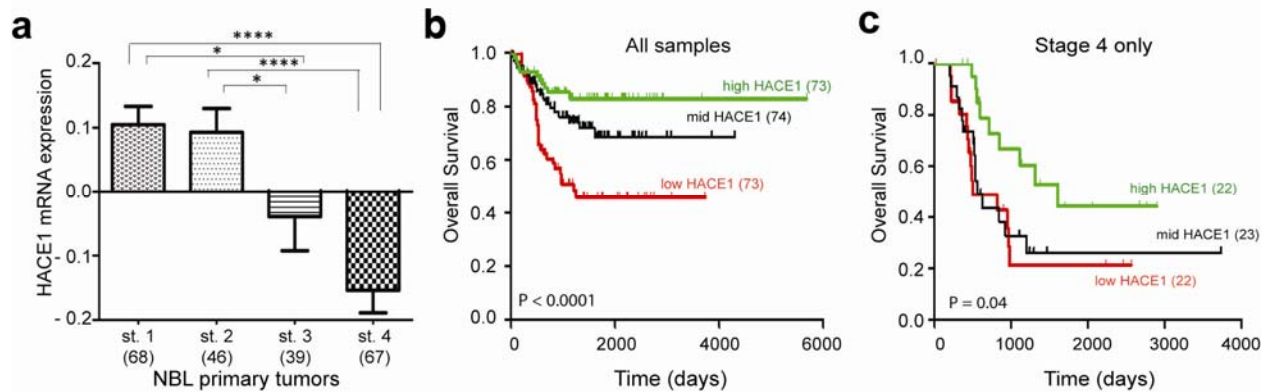

**Supplementary Figure 11. Decreased *HACE1* expression is associated with advanced stage disease and poor overall survival.** **a.** Expression of *HACE1* in 220 primary neuroblastomas is shown according to INSS stage in bar graph format (error bars: SEM). Data are from a custom Agilent mRNA expression array published by Oberthuer and colleagues(2) and were downloaded from the Oncogenomics website at the National Cancer Institute (NCI; <http://home.ccr.cancer.gov/oncology/oncogenomics>). \*\*\*\*  $P < 0.0001$ , \*  $P < 0.05$ . **b.** Decreased *HACE1* expression in diagnostic tumors predicts for worse overall survival; Kaplan Meier analysis shown. Neuroblastoma patients are grouped based on tertiles of *HACE1* expression in tumors. Log rank p-value shown. **c.** Decreased *HACE1* in predicts for worse overall survival within the aggressive stage 4 tumors; Kaplan Meier based on tertiles of *HACE1* expression. Log rank p-value shown.

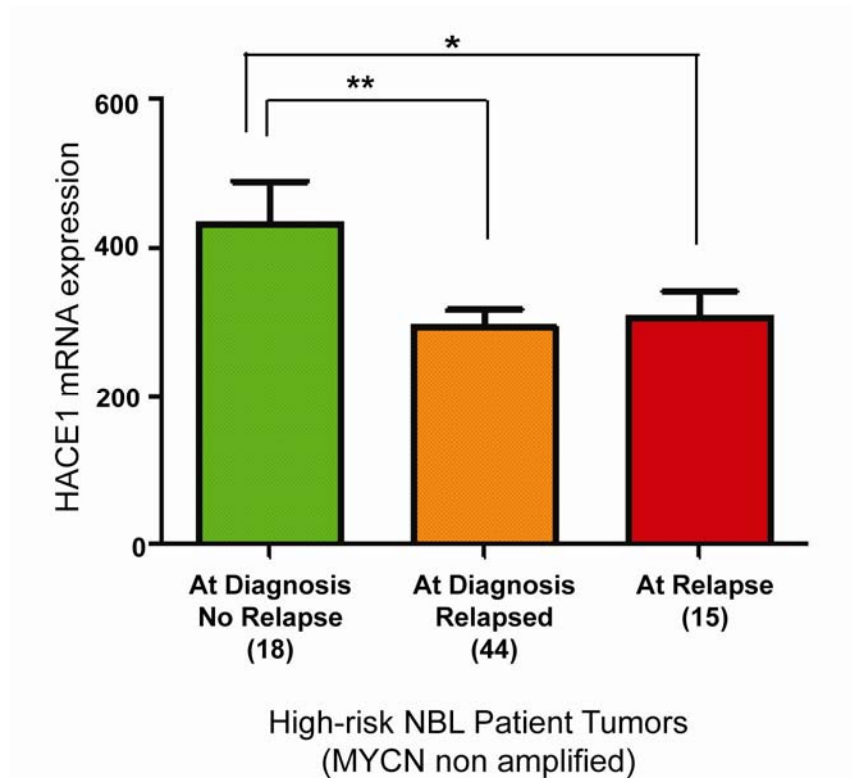

**Supplementary Figure 12. Decreased *HACE1* expression associated with disease progression in high-risk MYCN non-amplified tumors.** Expression of *HACE1* in seventy-seven high-risk neuroblastomas without MYCN amplification is shown in bar graph format (error bars: SEM). Data are from the Affymetrix U133 mRNA expression array published by Asgharzadeh and colleagues(3). *HACE1* expression is significantly higher in high-risk tumors at diagnosis that were relapse-free for 5-years. \*\*  $P < 0.01$ ; \*  $P < 0.05$ .



### III. SUPPLEMENTARY REFERENCES

1. Neale, G., Su, X., Morton, C.L., Phelps, D., Gorlick, R., Lock, R.B., Reynolds, C.P., Maris, J.M., Friedman, H.S., Dome, J., Khoury, J., Triche, T.J., Seeger, R.C., Gilbertson, R., Khan, J., Smith, M.A., and Houghton, P.J. 2008. Molecular characterization of the pediatric preclinical testing panel. *Clin Cancer Res* 14:4572-4583.
2. Oberthuer, A., Berthold, F., Warnat, P., Hero, B., Kahlert, Y., Spitz, R., Ernestus, K., Konig, R., Haas, S., Eils, R., Schwab, M., Brors, B., Westermann, F., and Fischer, M. 2006. Customized oligonucleotide microarray gene expression-based classification of neuroblastoma patients outperforms current clinical risk stratification. *J Clin Oncol* 24:5070-5078.
3. Asgharzadeh, S., Pique-Regi, R., Sposto, R., Wang, H., Yang, Y., Shimada, H., Matthay, K., Buckley, J., Ortega, A., and Seeger, R.C. 2006. Prognostic significance of gene expression profiles of metastatic neuroblastomas lacking MYCN gene amplification. *J Natl Cancer Inst* 98:1193-1203.
